# Supplementary material for: COVID-19 Modulates Inflammatory and Renal Markers That May Predict Hospital Outcomes among African American Males
Source: MDPI journal article supplement (doi:10.3390/v13122415), 2021-12-02
Supplement: s1 [file s1]

**Table S1.** Distribution of cytokine, renal toxicity marker levels (median [IQR] of log2pg/mL) by COVID status.

|             | Control              | Non ICU              | ICU                  | p-value        |                    |                | FDR                |                |       |
|-------------|----------------------|----------------------|----------------------|----------------|--------------------|----------------|--------------------|----------------|-------|
|             | (N=31)               | (N=26)               | (N=30)               | ICU vs control | Non-ICU vs control | ICU vs non-ICU | Non-ICU vs control | ICU vs non-ICU |       |
| IL6         | 1.41 [0.438, 2.36]   | 1.30 [0.184, 2.35]   | 2.29 [1.40, 4.14]    | 0.021          | 0.872              | 0.007          | 0.037              | 0.994          | 0.016 |
| IL18        | -3.18 [-3.47, -3.00] | -2.69 [-2.92, -2.31] | -2.15 [-2.60, -1.94] | <0.001         | 0.030              | 0.002          | <0.001             | 0.071          | 0.011 |
| MCP1        | 2.02 [1.18, 3.10]    | 2.08 [1.55, 2.84]    | 3.06 [2.19, 4.28]    | 0.027          | 0.824              | 0.138          | 0.038              | 0.994          | 0.193 |
| MIP1a       | -0.05 [-0.60, 0.54]  | -0.04 [-0.49, 0.91]  | 1.19 [0.524, 1.94]   | 0.004          | 0.981              | 0.003          | 0.009              | 0.994          | 0.011 |
| RANTES      | 6.44 [5.60, 7.30]    | 6.50 [5.85, 7.09]    | 7.04 [6.20, 8.17]    | 0.287          | 0.994              | 0.372          | 0.335              | 0.994          | 0.372 |
| IL1b        | 1.51 [0.342, 2.24]   | 0.67 [0.07, 1.22]    | 0.948 [0.59, 1.38]   | 0.492          | 0.008              | 0.126          | 0.492              | 0.028          | 0.193 |
| IL33        | 0.23 [-0.64, 0.77]   | 1.10 [0.764, 1.55]   | 1.50 [1.10, 2.10]    | <0.001         | 0.004              | 0.296          | <0.001             | 0.028          | 0.345 |
| Calbindin   | 3.36 [2.81, 3.57]    | 3.39 [2.69, 3.66]    | 2.98 [2.35, 3.33]    | 0.418          | 0.998              | 0.421          | 0.603              | 0.998          | 0.541 |
| Clusterin   | 8.87 [7.12, 9.07]    | 8.80 [6.88, 9.01]    | 7.95 [7.23, 8.96]    | 0.796          | 0.975              | 0.914          | 0.896              | 0.998          | 0.966 |
| GST         | 1.31 [1.08, 1.75]    | 1.75 [1.08, 1.94]    | 1.94 [1.45, 2.41]    | 0.008          | 0.659              | 0.104          | 0.037              | 0.998          | 0.188 |
| KIM1        | -4.32 [-5.06, -3.74] | -4.06 [-5.06, -3.47] | -4.06 [-4.64, -3.32] | 0.469          | 0.659              | 0.966          | 0.603              | 0.998          | 0.966 |
| B2M         | 1.42 [1.00, 1.64]    | 0.69 [0.08, 1.38]    | 1.24 [1.03, 1.69]    | 0.985          | 0.049              | 0.074          | 0.985              | 0.440          | 0.166 |
| Cystatin_C  | 2.94 [2.62, 3.26]    | 3.03 [2.56, 3.32]    | 3.18 [2.93, 3.45]    | 0.102          | 0.794              | 0.348          | 0.183              | 0.998          | 0.521 |
| NGAL        | 1.78 [1.38, 2.22]    | 1.66 [1.36, 2.08]    | 2.03 [1.80, 2.56]    | 0.053          | 0.933              | 0.028          | 0.122              | 0.998          | 0.119 |
| Osteopontin | 4.83 [4.43, 5.32]    | 4.66 [4.41, 5.48]    | 5.54 [4.77, 6.53]    | 0.005          | 0.892              | 0.028          | 0.037              | 0.998          | 0.119 |
| TFF3        | 4.36 [3.91, 4.82]    | 4.35 [3.93, 4.62]    | 4.61 [4.37, 4.97]    | 0.054          | 0.970              | 0.040          | 0.122              | 0.998          | 0.119 |

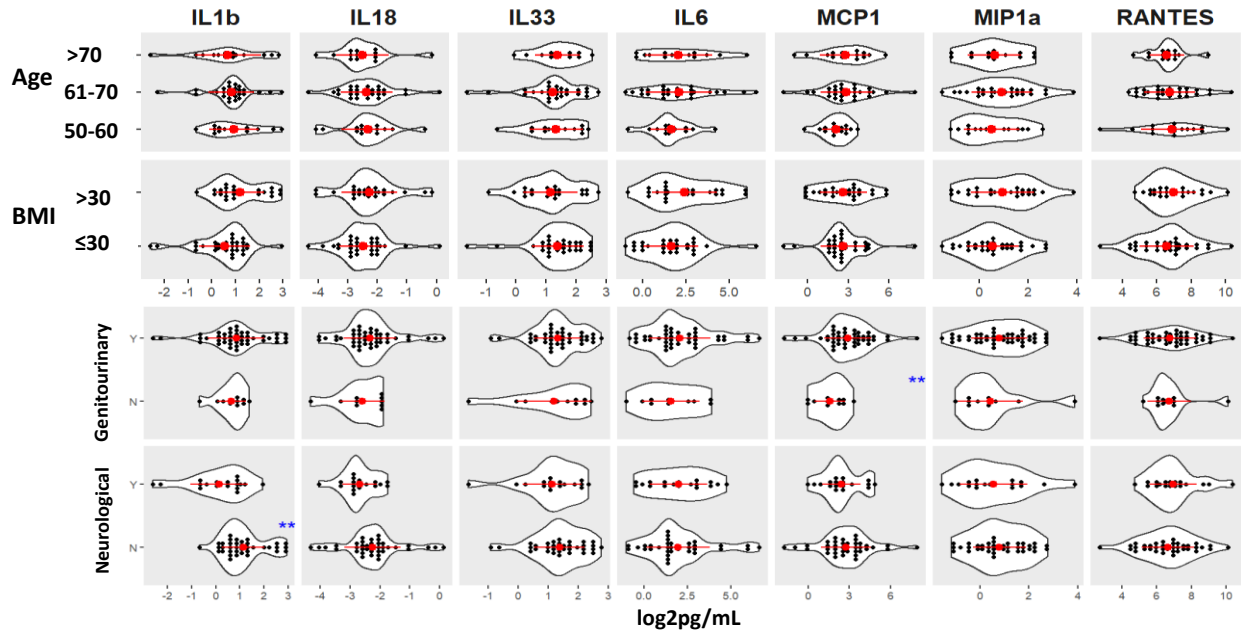

**Figure S1.** Cytokine levels by COVID-19 patient characteristics at baseline. \*: adjusted  $p$ -value (FDR)  $\leq 0.1$ ; \*\*: adjusted  $p$ -value (FDR)  $\leq 0.05$ . Only significant variables were shown for medical history.

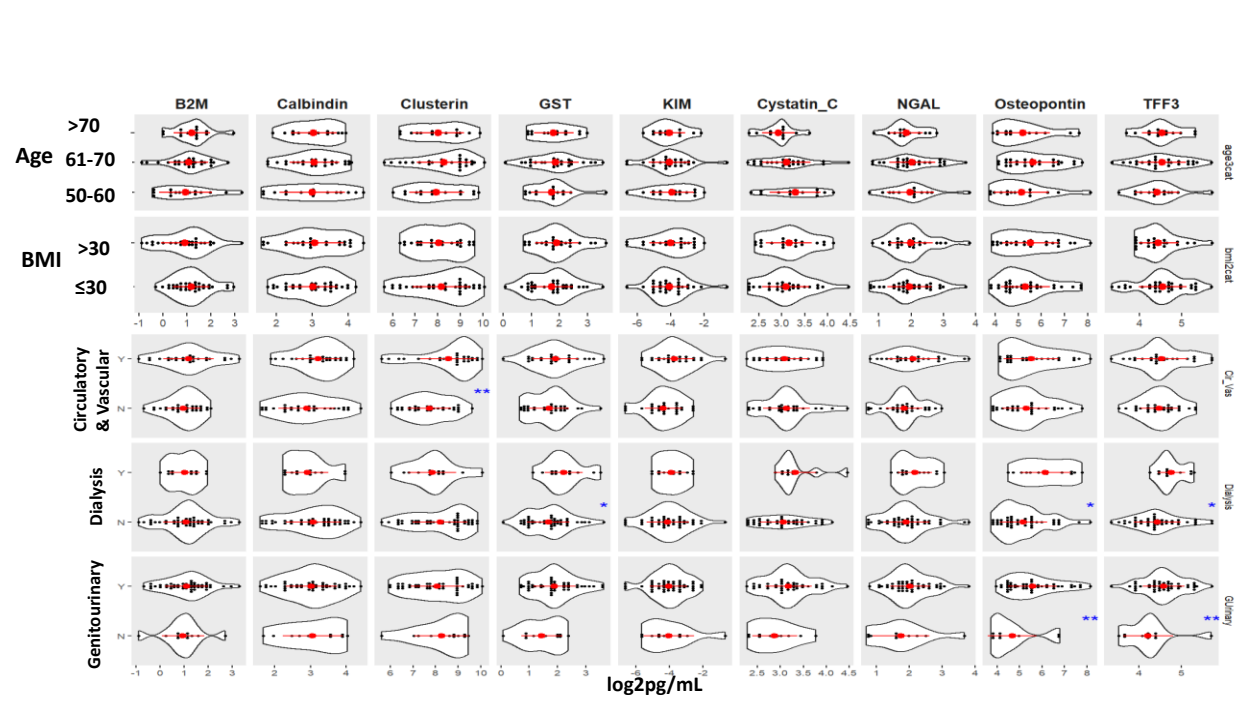

Figure S2. Renal toxicity marker levels by COVID-19 patient characteristics at baseline. \*: adjusted p-value (FDR)  $\leq 0.1$ ; \*\*: adjusted p-value (FDR)  $\leq 0.05$ . Only significant variables were shown for medical history.
